# Supplementary material
Source: ML conference proceedings conference paper supplement (https://openaccess.thecvf.com/content/ICCV2025/html/Zhu_Accelerating_Diffusion_Sampling_ICCV_2025_paper.html)
Supplement: Supplementary file 1 [file Zhu_Accelerating_Diffusion_Sampling_ICCV_2025_supplemental.pdf]

# Accelerating Diffusion Sampling via Exploiting Local Transition Coherence

## Overview

The supplementary materials consist of three sections:

- **The first section provides supplementary ablation studies mentioned in ??** (See Appendix A).
- **The second section is the Mathematical Derivation of LTC-ACCEL** (see Appendix B). The overall mathematical derivation consists of two parts:
  - We present the derivation process of  $w_g$  in detail (see Appendix B.1).
  - We introduce the derivation process for the error upper bound inequality in detail (see Appendix B.2).
  - We provide additional experimental evidence demonstrating the convergence of  $w_g$  and show that this convergence holds across different schedulers (see Appendix B.3).
- **The third section details the experimental setup for the figures** (see Appendix C).
- **The final section focuses on providing detailed experimental settings** (see Appendix D), including three parts:
  - We provide the details of the acceleration interval and the conditions for setting the approximated steps (see Appendix D.1).
  - We specify which experiments utilized the optional algorithm and which did not (see Appendix D.2).
  - We present intuitive experimental visual results to demonstrate the effectiveness of our LTC-ACCEL (see Appendix E).

## A. Ablation Studies

In this section, we perform ablation studies to further assess and validate the effectiveness of our method.

**Directly Skipping Steps:** We compare our approach with the Skipping Steps strategy within the same acceleration framework. Tab. 6 shows that our method improves computational efficiency over the original approach while preserving generation quality better than the Skipping Steps.

## B. Mathematical Derivation

### B.1. Derivation of $w_g$

To derive the  $w_g$ , we have:

$$w_g = \arg \min \left( \|\Delta \mathbf{x}_{t+1,t} - w_g \gamma \Delta \mathbf{x}_{t+2,t+1}\|^2 \right). \quad (9)$$

| Model | Scheduler | Skipping Steps |                        | LTC-ACCEL |                        |
|-------|-----------|----------------|------------------------|-----------|------------------------|
|       |           | Steps          | ImageReward $\uparrow$ | Steps     | ImageReward $\uparrow$ |
| SD v2 | DDIM      | 7              | 0.0537                 | 7         | 0.1472                 |
|       | DDIM      | 10             | 0.2003                 | 10        | 0.2442                 |
|       | DDIM      | 13             | 0.2812                 | 13        | 0.3129                 |
| SD v2 | EDM       | 7              | 0.0158                 | 7         | 0.2018                 |
|       | EDM       | 10             | 0.2003                 | 10        | 0.3171                 |
|       | EDM       | 13             | 0.2582                 | 13        | 0.3335                 |

**Table 6.** Ablation study comparing LTC-ACCEL with the **Skipping Steps** method under the same acceleration framework. The results show that LTC-ACCEL outperforms Skipping Steps, indicating the effectiveness of LTC-ACCEL. The results demonstrate that our method **consistently outperforms** the Skipping Steps strategy in all scenarios.

We expand the objective function in terms of the inner product:

$$\begin{aligned} & \|\Delta \mathbf{x}_{t+1,t} - w_g \gamma \Delta \mathbf{x}_{t+2,t+1}\|^2 \\ &= \|\Delta \mathbf{x}_{t+1,t}\|^2 - 2w_g \gamma (\Delta \mathbf{x}_{t+1,t} \cdot \Delta \mathbf{x}_{t+2,t+1}) \\ & \quad + w_g^2 \gamma^2 \|\Delta \mathbf{x}_{t+2,t+1}\|^2. \end{aligned} \quad (10)$$

Taking the derivative of this expression with respect to  $w_g$  and setting it equal to zero yields:

$$\begin{aligned} & \frac{\partial}{\partial w_g} \left[ \|\Delta \mathbf{x}_{t+1,t} - w_g \gamma \Delta \mathbf{x}_{t+2,t+1}\|^2 \right] \\ &= -2\gamma (\Delta \mathbf{x}_{t+1,t} \cdot \Delta \mathbf{x}_{t+2,t+1}) + 2w_g \gamma^2 \|\Delta \mathbf{x}_{t+2,t+1}\|^2 \\ &= 0. \end{aligned} \quad (11)$$

Rearranging this equation, we obtain:

$$w_g \gamma \|\Delta \mathbf{x}_{t+2,t+1}\|^2 = \Delta \mathbf{x}_{t+1,t} \cdot \Delta \mathbf{x}_{t+2,t+1}. \quad (12)$$

Thus, the final expression for  $w_g$  is given by:

$$w_g = \frac{\Delta \mathbf{x}_{t+1,t} \cdot \Delta \mathbf{x}_{t+2,t+1}}{\gamma \|\Delta \mathbf{x}_{t+2,t+1}\|^2}. \quad (13)$$

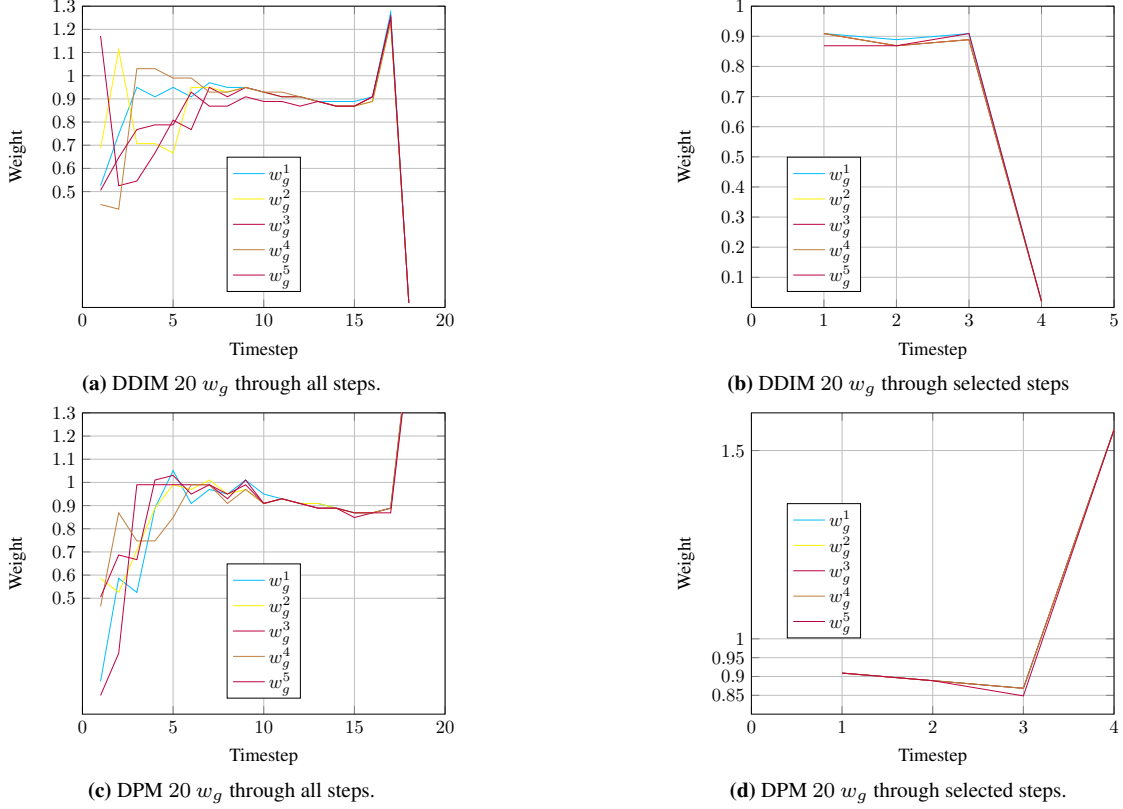

**Figure 6.** Quantitative results of the variation of  $w_g$ . We present our results on DDIM and DPM-Solver++ in 20 steps, with 5 different prompts and latents. Fig. 6a and Fig. 6c demonstrate the original results without acceleration, where  $w_g$  achieves convergence after about 12 steps. Fig. 6b and Fig. 6d show the results within the acceleration interval [12, 20], where different weights are almost the same, indicating strong feature of convergence.

## B.2. Derivation of the Error Upper Bound Inequality

To derive the inequality, we have:

$$\theta = \arccos\left(\frac{\Delta x_{t+1,t} \cdot \Delta x_{t+2,t+1}}{\|\Delta x_{t+1,t}\|^2 \|\Delta x_{t+2,t+1}\|^2}\right) < \tau, \quad (14)$$

which is equivalent to:

$$\frac{\Delta x_{t+1,t} \cdot \Delta x_{t+2,t+1}}{\|\Delta x_{t+1,t}\|^2 \|\Delta x_{t+2,t+1}\|^2} > \cos \tau. \quad (15)$$

Substituting this back into Eq. (9), we get:

$$\|\Delta x_{t+1,t}\|^2 - \frac{(\Delta x_{t+1,t} \cdot \Delta x_{t+2,t+1})^2}{\|\Delta x_{t+2,t+1}\|^2}. \quad (16)$$

Squaring both sides of the inequality and substituting the

expressions, we can derive:

$$\begin{aligned} & \|\Delta x_{t+1,t} - w_g \gamma \Delta x_{t+2,t+1}\|^2 \\ & \leq \|\Delta x_{t+1,t}\|^2 (1 - \cos^2 \tau) \\ & = \|\Delta x_{t+1,t}\|^2 \sin^2 \tau \\ & \leq \|\Delta x_{t+1,t}\|^2 \tau^2. \end{aligned} \quad (17)$$

## B.3. Experimental Verification of $w_g$ Convergence

We select DPM-Solver++ [5] and DDIM [8] as representative schedulers for our experiments on Stable Diffusion v2. Given that  $w_g$  tends to exhibit stronger convergence with more steps, we choose 20 steps as a representative case. Fig. 6a and Fig. 6c illustrate the convergence behavior of the original  $w_g$ , while Fig. 6b and Fig. 6d demonstrate that the  $w_g$  values obtained through our algorithm also exhibit convergence.

## C. Experimental Setup for Figures

In this section, we provide the experimental settings for all figures presented in the main text.



- **Figure 1**
  - The base model is Stable Diffusion v3.5 [1], and the corresponding scheduler is DPM-Solver++.
  - We select the acceleration condition as  $t \bmod r = r - 1$  and  $t > 4$ , where the period parameter  $r$  is set as  $r = 2$ .
- **Figure 2**
  - (a) The base model is Stable Diffusion v2 [7], and the baseline is DeepCache [6] with 50 steps where  $N = 2$ . We select the acceleration condition as  $t \bmod r = r - 3$  and  $t > 12$ , where the period parameter  $r$  is set as  $r = 3$  only in experiments about DeepCache.
  - (b) The baseline model is Animated-Diff [2] model, and the Distillation model is Animated-Diff-Lightning [4] with 4 steps under the scheduler EDM [3]. We select the acceleration condition as  $t \bmod r = r - 1$  and  $t > 2$ , where the period parameter  $r$  is set as  $r = 2$ .
- **Figure 3**
  - (a) The base model is Stable Diffusion v2, and the corresponding scheduler is DDIM. The result is obtained at 40 steps.
  - (b) We select the acceleration condition as  $t \bmod r = r - 1$  and  $t > 12$  based on the original setting, where the period parameter  $r$  is set as  $r = 2$ .
  - (c) The base model is Stable Diffusion v2, and the corresponding scheduler is DDIM. The weight values are obtained at 40 steps. Note that the acceleration condition here is ( $t > 1$ ), and the approximated value is not assigned to  $x$  to prevent accumulated errors from deviating the results from the original process.
- **Figure 4**
  - The base model is Stable Diffusion v2, and the corresponding scheduler is DDIM. The result is obtained at 40 steps. We select the acceleration condition as  $t \bmod r = r - 1$  and  $t > 12$  based on the original setting, where the period parameter  $r$  is set as  $r = 2$ . We give trials to a series of bias from 0.0125 to 0.05.
- **Figure 5**
  - The detailed acceleration settings are available in Tab. 7.

## D. Experimental Details

In this section, we give a further insight into relevant details of the experiments mentioned in the paper, including the settings of acceleration intervals, the optional  $w_g$  algorithm.

### D.1. Acceleration Interval

As our method mentioned, we select certain consecutive timesteps as the acceleration interval if the angles formed between their transition operators are less than a threshold  $\tau$ . Typically, we prefer to set  $\tau = 0.1$ . However, the threshold and specific acceleration interval may vary slightly by manual adjustment according to the actual angle plot, in

case of a few abnormal angle data samples.

After choosing the acceleration interval, we need to set the period of acceleration, which is defined as the parameter  $r$  in the paper. In most cases, the acceleration is applied at timestep  $x_t$  within the acceleration interval if  $t \bmod r = r - 1$ . Generally,  $r = 2$  is applicable for almost all the cases without any other modification manually, which demonstrates the versatility of our method. The acceleration condition may be adjusted if further improvements in generation quality are required.

### Text-to-image Synthesis Task

Tab. 7 presents the detailed results of all the experiments we conduct on Stable Diffusion v2 and v3.5-mid in the text-to-image synthesis task, with acceleration settings attached. And Tab. 8 and Tab. 9 show the acceleration settings of each group. Notably,  $r = 2$  is across all these experiments, except for the case that  $r = 3$  in the experiment with DeepCache in Tab. 8.

### Text-to-video Synthesis Task

We evaluate video quality from two perspectives: Frame Consistency and Textual Faithfulness. For Frame Consistency, we compute CLIP image embeddings for every frame of the output video and report the average cosine similarity among all frame pairs. For Textual Faithfulness, we compute the average ImageReward score between each output video frame and its corresponding edited prompt. From the results, we achieve a  $1.54\times$  speedup with almost no impact on video generation quality.

Tab. 10 gives a specific view of the acceleration settings for the experiments we conduct on video models in the text-to-video synthesis task. In addition, Tab. 11 presents the acceleration settings in distillation as well. All the experiments keep consistent in  $r = 2$ .

### Ablation Study

The acceleration framework in the ablation experiment with "Skipping Steps" strategy is shown in Tab. 12. In addition, we conduct further ablation studies on Align Your Steps and present results together with acceleration settings in Tab. 13.

### D.2. Optional $w_g$ Algorithm

The optional  $w_g$  algorithm is designed to further minimize the difference between the  $w_g$  we obtain and the optimal one, since in each iteration we just compute an approximate solution. However, most of the experiments demonstrate that even without the optional  $w_g$  algorithm our method can achieve promising effects on various models and schedulers, with little bias from the original process. Therefore, we apply the optional algorithm only to DDIM.

### D.3. Hyperparameters

In our method, we emphasize that no manual tuning is required during deployment beyond choosing the accelera-

| Metric      | Model   | Scheduler    | Original       |              | LTC-ACCEL      |              | Acceleration Condition                      | Speedup |
|-------------|---------|--------------|----------------|--------------|----------------|--------------|---------------------------------------------|---------|
|             |         |              | Inference Step | Metric Value | Inference Step | Metric Value |                                             |         |
| ImageReward | SD v2   | DDIM         | 10             | -0.5070      | 6              | 0.0261       | $t \bmod r = r - 1$ and $t > 2$             | 1.67×   |
| ImageReward | SD v2   | DDIM         | 20             | 0.3185       | 12             | 0.3117       | $t \bmod r = r - 1$ and $t > 4$             | 1.67×   |
| ImageReward | SD v2   | DDIM         | 30             | 0.3578       | 20             | 0.3541       | $t \bmod r = r - 1$ and $t > 10$            | 1.50×   |
| ImageReward | SD v2   | DDIM         | 40             | 0.3967       | 26             | 0.4009       | $t \bmod r = r - 1$ and $t > 12$            | 1.54×   |
| ImageReward | SD v2   | DDIM         | 50             | 0.4209       | 30             | 0.4183       | $t \bmod r = r - 1$ and $t > 10$            | 1.67×   |
| ImageReward | SD v2   | DDIM         | 100            | 0.4266       | 60             | 0.4316       | $t \bmod r = r - 1$ and $t > 20$            | 1.67×   |
| ImageReward | SD v3.5 | DPM-Solver++ | 12             | 0.4795       | 8              | 0.4796       | $t \bmod r = r - 1$ and $t > 4$             | 1.50×   |
| ImageReward | SD v3.5 | DPM-Solver++ | 24             | 0.9249       | 16             | 0.9287       | $t \bmod r = r - 1$ and $t > 8$             | 1.50×   |
| ImageReward | SD v3.5 | DPM-Solver++ | 36             | 1.0254       | 24             | 1.0313       | $t \bmod r = r - 1$ and $t > 12$            | 1.50×   |
| ImageReward | SD v3.5 | DPM-Solver++ | 48             | 1.0990       | 32             | 1.1016       | $t \bmod r = r - 1$ and $t > 16$            | 1.50×   |
| ImageReward | SD v3.5 | DPM-Solver++ | 60             | 1.0755       | 40             | 1.0785       | $t \bmod r = r - 1$ and $t > 20$            | 1.50×   |
| ImageReward | SD v3.5 | EDM          | 20             | 0.9351       | 13             | 0.9089       | $t \bmod r = r - 1$ and $t > 6$             | 1.53×   |
| ImageReward | SD v3.5 | EDM          | 30             | 1.0166       | 19             | 1.0040       | $t \bmod r = r - 1$ and $t > 8$             | 1.58×   |
| ImageReward | SD v3.5 | EDM          | 40             | 1.0578       | 26             | 1.0497       | $t \bmod r = r - 1$ and $11 \leq t \leq 37$ | 1.54×   |
| ImageReward | SD v3.5 | EDM          | 50             | 1.0725       | 30             | 1.0623       | $t \bmod r = r - 1$ and $t > 10$            | 1.67×   |
| ImageReward | SD v3.5 | EDM          | 60             | 1.0766       | 39             | 1.0691       | $t \bmod r = r - 1$ and $15 \leq t \leq 55$ | 1.54×   |
| PickScore   | SD v2   | DDIM         | 10             | 20.08        | 6              | 21.09        | $t \bmod r = r - 1$ and $t > 2$             | 1.67×   |
| PickScore   | SD v2   | DDIM         | 20             | 21.53        | 12             | 21.52        | $t \bmod r = r - 1$ and $t > 4$             | 1.67×   |
| PickScore   | SD v2   | DDIM         | 30             | 21.60        | 20             | 21.59        | $t \bmod r = r - 1$ and $t > 10$            | 1.50×   |
| PickScore   | SD v2   | DDIM         | 40             | 21.66        | 26             | 21.65        | $t \bmod r = r - 1$ and $t > 12$            | 1.54×   |
| PickScore   | SD v2   | DDIM         | 50             | 21.69        | 30             | 21.69        | $t \bmod r = r - 1$ and $t > 10$            | 1.67×   |
| PickScore   | SD v2   | DDIM         | 100            | 21.73        | 60             | 21.73        | $t \bmod r = r - 1$ and $t > 20$            | 1.67×   |
| PickScore   | SD v3.5 | DPM-Solver++ | 12             | 21.23        | 8              | 21.21        | $t \bmod r = r - 1$ and $t > 4$             | 1.50×   |
| PickScore   | SD v3.5 | DPM-Solver++ | 24             | 21.93        | 16             | 21.95        | $t \bmod r = r - 1$ and $t > 8$             | 1.50×   |
| PickScore   | SD v3.5 | DPM-Solver++ | 36             | 22.19        | 24             | 22.21        | $t \bmod r = r - 1$ and $t > 12$            | 1.50×   |
| PickScore   | SD v3.5 | DPM-Solver++ | 48             | 22.26        | 32             | 22.28        | $t \bmod r = r - 1$ and $t > 16$            | 1.50×   |
| PickScore   | SD v3.5 | DPM-Solver++ | 60             | 22.33        | 40             | 22.35        | $t \bmod r = r - 1$ and $t > 20$            | 1.50×   |
| PickScore   | SD v3.5 | EDM          | 20             | 22.28        | 13             | 22.23        | $t \bmod r = r - 1$ and $t > 6$             | 1.53×   |
| PickScore   | SD v3.5 | EDM          | 30             | 22.43        | 19             | 22.28        | $t \bmod r = r - 1$ and $t > 8$             | 1.58×   |
| PickScore   | SD v3.5 | EDM          | 40             | 22.51        | 26             | 22.49        | $t \bmod r = r - 1$ and $11 \leq t \leq 37$ | 1.54×   |
| PickScore   | SD v3.5 | EDM          | 50             | 22.53        | 30             | 22.52        | $t \bmod r = r - 1$ and $t > 10$            | 1.67×   |
| PickScore   | SD v3.5 | EDM          | 60             | 22.53        | 39             | 22.52        | $t \bmod r = r - 1$ and $15 \leq t \leq 55$ | 1.54×   |

**Table 7.** Text-to-image Synthesis on Stable Diffusion.

| Model | DeepCache      |      |              | LTC-ACCEL      |      |              | Acceleration Condition                   | Speedup |
|-------|----------------|------|--------------|----------------|------|--------------|------------------------------------------|---------|
|       | Inference Step | Time | Image Reward | Inference Step | Time | Image Reward |                                          |         |
| SD v2 | 10             | 264  | -0.2246      | 8              | 208  | -0.2739      | $t \bmod r = r - 1$ and $t > 4$          | 1.25×   |
|       | 20             | 524  | 0.2445       | 16             | 419  | 0.2456       | $t \bmod r = r - 1$ and $t > 8$          | 1.25×   |
|       | 50             | 1411 | 0.4039       | 38             | 1038 | 0.4096       | $t \bmod r = r - 3$ and $t > 12$         | 1.41×   |
|       | 100            | 3014 | 0.4242       | 75             | 2171 | 0.4246       | $t \bmod r = r - 3$ and $24 < t \leq 90$ | 1.38×   |

**Table 8.** Quantitative results of text-to-image, combining our method with Deepcache, where the parameter  $N$  mentioned in DeepCache remains  $N = 2$ .

tion interval—all other key hyperparameters are either automatically computed or empirically robust across different prompts and settings.

1.  $w_g$  : The main hyperparameter  $w_g$  is automatically computed via ?? and consistently converges within the acceleration interval (???), indicating **prompt-agnostic** behavior. In all experiments,  $w_g$  is computed once from a single prompt and reused. Its overhead is **comparable to a single forward pass**. The generality

of  $w_g$  is supported by strong results across diverse prompts (?? and Fig. 6).

2.  $\phi(t)$  :  $\phi(t)$  defines the relative importance of each timestep and serves as a smooth baseline for computing  $\gamma$ . Though its effect is normalized out in  $w_g \cdot \gamma$ , it stabilizes the solution of  $w_g$  by smoothing temporal weights—a design inspired by ODE solvers. This allows  $w_g$  to adapt to model dynamics while keeping  $\phi$  fixed and general. Ablations in Fig. 7d show consistent

| Model   | Scheduler    | Original       |              | Ays            |              | LTC-ACCEL      |              | Acceleration Condition          | Speedup |
|---------|--------------|----------------|--------------|----------------|--------------|----------------|--------------|---------------------------------|---------|
|         |              | Inference Step | Image Reward | Inference Step | Image Reward | Inference Step | Image Reward |                                 |         |
| SD v1.5 | DPM-Solver++ | 10             | 0.1111       | 10             | 0.1332       | 8              | 0.1309       | $t \bmod r = r - 1$ and $t > 6$ | 1.25×   |

**Table 9.** Quantitative results of text-to-image, combining our method with Align Your Steps.

| Model            | Inference Step | Original     |                   | Inference Step | LTC-ACCEL    |                   | Acceleration Condition           | Speedup |
|------------------|----------------|--------------|-------------------|----------------|--------------|-------------------|----------------------------------|---------|
|                  |                | Image Reward | Frame Consistency |                | Image Reward | Frame Consistency |                                  |         |
| epiCRealism      | 10             | 0.2439       | 0.9713            | 7              | 0.2426       | 0.9700            | $t \bmod r = r - 1$ and $t > 4$  | 1.43×   |
| epiCRealism      | 20             | 0.3050       | 0.9729            | 13             | 0.2939       | 0.9732            | $t \bmod r = r - 1$ and $t > 6$  | 1.54×   |
| epiCRealism      | 30             | 0.3662       | 0.9676            | 19             | 0.3465       | 0.9681            | $t \bmod r = r - 1$ and $t > 8$  | 1.58×   |
| realistic-vision | 10             | 0.1142       | 0.9636            | 7              | 0.1135       | 0.9633            | $t \bmod r = r - 1$ and $t > 4$  | 1.43×   |
| realistic-vision | 20             | 0.2646       | 0.9676            | 13             | 0.2683       | 0.9672            | $t \bmod r = r - 1$ and $t > 6$  | 1.54×   |
| realistic-vision | 30             | 0.4046       | 0.9655            | 19             | 0.3913       | 0.9669            | $t \bmod r = r - 1$ and $t > 8$  | 1.58×   |
| CogVideoX-2B     | 20             | -0.1441      | 0.9442            | 14             | -0.1673      | 0.9361            | $t \bmod r = r - 1$ and $t > 8$  | 1.43×   |
| CogVideoX-2B     | 30             | 0.2302       | 0.9464            | 19             | 0.2320       | 0.9435            | $t \bmod r = r - 1$ and $t > 8$  | 1.58×   |
| CogVideoX-2B     | 40             | 0.3918       | 0.9514            | 26             | 0.3775       | 0.9511            | $t \bmod r = r - 1$ and $t > 12$ | 1.54×   |

**Table 10.** Quantitative results of text-to-video. We present our results on Animated-Diff, and CogVideoX by measuring the Textual Faithfulness and Frame Consistency using 100 prompt-video pairs.

performance across different  $\phi$ , confirming robustness.

3.  $r$  : We fix  $r = 2$  for all settings, except when using caching, where it adapts to reuse intermediate results.
4.  $\tau$  :  $\tau$  sets the acceleration interval. Larger values degrade quality via error accumulation. We suggest  $\tau < 0.15$  for speed-fidelity trade-off.
5. **Bias** : The bias promotes global refinement over local updates, as discussed in ??, with supporting results in ??. further shows this design yields clear quality gains over greedy baselines.”

To further validate the generalizability of these hyperparameters, we evaluate  $\tau$ , bias, and  $\phi$  as shown in Figures 7c and 7d. Results present the followings: (1) Large  $\tau$  degrades quality due to unstable denoising; (2) Bias enhances global performance; (3)  $\phi$ ’s choices minimally affect outcomes, indicating robustness.

#### D.4. Additional Video Experiments

Beyond the text-to-video experiments presented in the paper, we have conducted additional experiments using novel datasets and evaluation metrics. Specifically, we integrate vBench, a perceptual benchmark into our pipeline. To better reflect real-world scenarios, we use WebVid-style prompts, suited for video generation. We assess video quality via imaging quality and temporal flickering, as shown in Figure 7a. Despite substantial acceleration, flickering increases only marginally ( $\approx 0.02$ ), confirming that perceptual temporal consistency is largely preserved.

## E. Visual Results from Selected Experiments

To provide a more intuitive presentation of our experimental results, we have selected representative images from our experiments for visualization. For video experiments, only the first frame is extracted for comparison. The experimental settings correspond to the displayed images as follows.

- **Fig. 8** Results obtained using DDIM sampling on Stable Diffusion v2.
- **Fig. 9** Results obtained using EDM sampling on Stable Diffusion v3.5.
- **Fig. 10** Results obtained using DPMsolver++ sampling on Stable Diffusion v3.5.
- **Fig. 11** Based on the DeepCache model, the results obtained using DDIM sampling on Stable Diffusion v2.
- **Fig. 12** Based on the Align Your Steps method, we obtained sampling results using DPM-Solver++ on Stable Diffusion v1.5.
- **Fig. 13** Results obtained using DDIM sampling on CogVideoX-2B.
- **Fig. 14** Using EDM sampling on the Animated-Diff model based on epiCRealism.
- **Fig. 15** Using EDM sampling on the Animated-Diff model based on realistic-vision.
- **Fig. 16** Using EDM sampling on the Animated-Diff-lightning model based on epiCRealism.
- **Fig. 17** Using EDM sampling on the Animated-Diff-lightning model based on realistic-vision.

| Model            | Inference Step | Original     |                   | Inference Step | Original     |                   | LTC-ACCEL      |              |                   | Acceleration Condition          | Speedup      |
|------------------|----------------|--------------|-------------------|----------------|--------------|-------------------|----------------|--------------|-------------------|---------------------------------|--------------|
|                  |                | Image Reward | Frame Consistency |                | Image Reward | Frame Consistency | Inference Step | Image Reward | Frame Consistency |                                 |              |
| epiCRealism      | 4              | 0.3662       | 0.9685            | 3              | 0.2913       | 0.9673            | 3              | 0.3550       | 0.9645            | $t \bmod r = r - 1$ and $t > 2$ | $1.33\times$ |
| epiCRealism      | 8              | 0.3371       | 0.9697            | 5              | 0.2978       | 0.9690            | 5              | 0.3493       | 0.9654            | $t \bmod r = r - 1$ and $t > 2$ | $1.60\times$ |
| realistic-vision | 4              | 0.2412       | 0.9639            | 3              | 0.1249       | 0.9641            | 3              | 0.2156       | 0.9618            | $t \bmod r = r - 1$ and $t > 2$ | $1.33\times$ |
| realistic-vision | 8              | 0.2469       | 0.9623            | 5              | -0.0095      | 0.9635            | 5              | 0.2237       | 0.9598            | $t \bmod r = r - 1$ and $t > 2$ | $1.60\times$ |

**Table 11.** Quantitative results of text-to-video, combining our method with Animated-Diff-Lightning (the distilled version of Animated-Diff).

| Model | Scheduler | Skipping Steps |                        | LTC-ACCEL |                        | Acceleration Condition          |
|-------|-----------|----------------|------------------------|-----------|------------------------|---------------------------------|
|       |           | Steps          | ImageReward $\uparrow$ | Steps     | ImageReward $\uparrow$ |                                 |
| SD v2 | DDIM      | 7              | 0.0537                 | 7         | 0.1472                 | $t \bmod r = r - 1$ and $t > 4$ |
|       | DDIM      | 10             | 0.2003                 | 10        | 0.2442                 | $t \bmod r = r - 1$ and $t > 6$ |
|       | DDIM      | 13             | 0.2812                 | 13        | 0.3129                 | $t \bmod r = r - 1$ and $t > 6$ |
| SD v2 | EDM       | 7              | 0.0158                 | 7         | 0.2018                 | $t \bmod r = r - 1$ and $t > 4$ |
|       | EDM       | 10             | 0.2003                 | 10        | 0.3171                 | $t \bmod r = r - 1$ and $t > 6$ |
|       | EDM       | 13             | 0.2582                 | 13        | 0.3335                 | $t \bmod r = r - 1$ and $t > 6$ |

**Table 12.** Ablation study comparing LTC-ACCEL with the Skipping Steps method, where Skipping Steps maintains the same acceleration positions as ours.  $r = 2$  is consistent in the ablation study.

## References

- [1] Patrick Esser, Sumith Kulal, Andreas Blattmann, Rahim Entezari, Jonas Müller, Harry Saini, Yam Levi, Dominik Lorenz, Axel Sauer, Frederic Boesel, Dustin Podell, Tim Dockhorn, Zion English, Kyle Lacey, Alex Goodwin, Yannik Marek, and Robin Rombach. Scaling rectified flow transformers for high-resolution image synthesis, 2024.
- [2] Yuwei Guo, Ceyuan Yang, Anyi Rao, Zhengyang Liang, Yao-hui Wang, Yu Qiao, Maneesh Agrawala, Dahua Lin, and Bo Dai. Animatediff: Animate your personalized text-to-image diffusion models without specific tuning. *arXiv preprint arXiv:2307.04725*, 2023.
- [3] Tero Karras, Miika Aittala, Timo Aila, and Samuli Laine. Elucidating the design space of diffusion-based generative models. *NeurIPS*, 2022.
- [4] Shanchuan Lin and Xiao Yang. Animatediff-lightning: Cross-model diffusion distillation. *arXiv preprint arXiv:2403.12706*, 2024.
- [5] Cheng Lu, Yuhao Zhou, Fan Bao, Jianfei Chen, Chongxuan Li, and Jun Zhu. Dpm-solver++: Fast solver for guided sampling of diffusion probabilistic models. *arXiv preprint arXiv:2211.01095*, 2022.
- [6] Xinyin Ma, Gongfan Fang, and Xinchao Wang. Deepcache: Accelerating diffusion models for free. *IEEE*, 2023.
- [7] Robin Rombach, Andreas Blattmann, Dominik Lorenz, Patrick Esser, and Bjorn Ommer. High-resolution image synthesis with latent diffusion models. In *CVPR*, 2022.
- [8] Jiaming Song, Chenlin Meng, and Stefano Ermon. Denoising diffusion implicit models. *arXiv preprint arXiv:2010.02502*, 2020.

| Model   | Scheduler    | Ays + Skip-steps |              | Ays + LTC-ACCEL |              | Acceleration Condition          |
|---------|--------------|------------------|--------------|-----------------|--------------|---------------------------------|
|         |              | Inference Step   | Image Reward | Inference Step  | Image Reward |                                 |
| SD v1.5 | DPM-Solver++ | 8                | 0.0820       | 8               | 0.1309       | $t \bmod r = r - 1$ and $t > 6$ |

**Table 13.** Ablation study comparing our method with Align Your Steps (Ays), where Ays maintains the same acceleration positions as ours.  $r = 2$  is consistent in the ablation study.

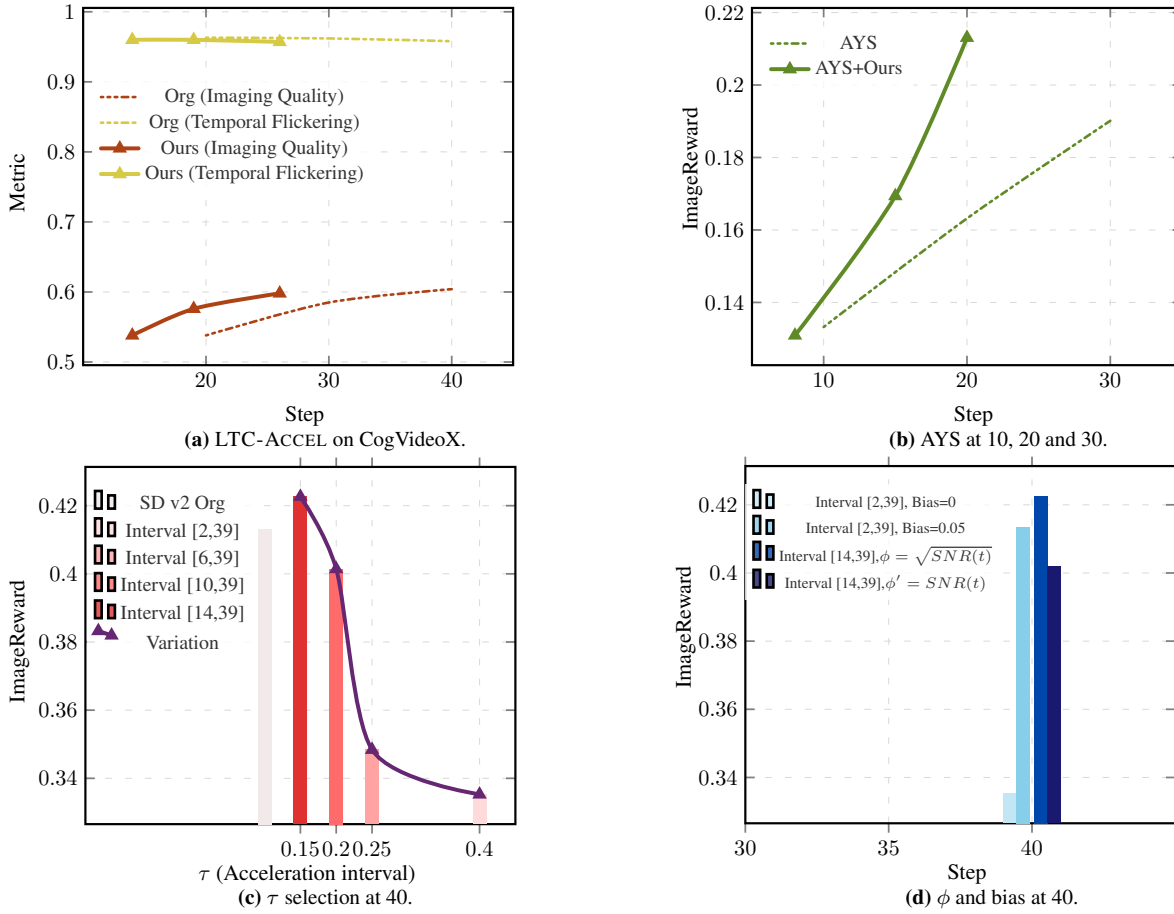

**Figure 7.** Comparative experiments on video generations, compatibility with AYS, and ablation studies on interval selection,  $\phi$  and bias.



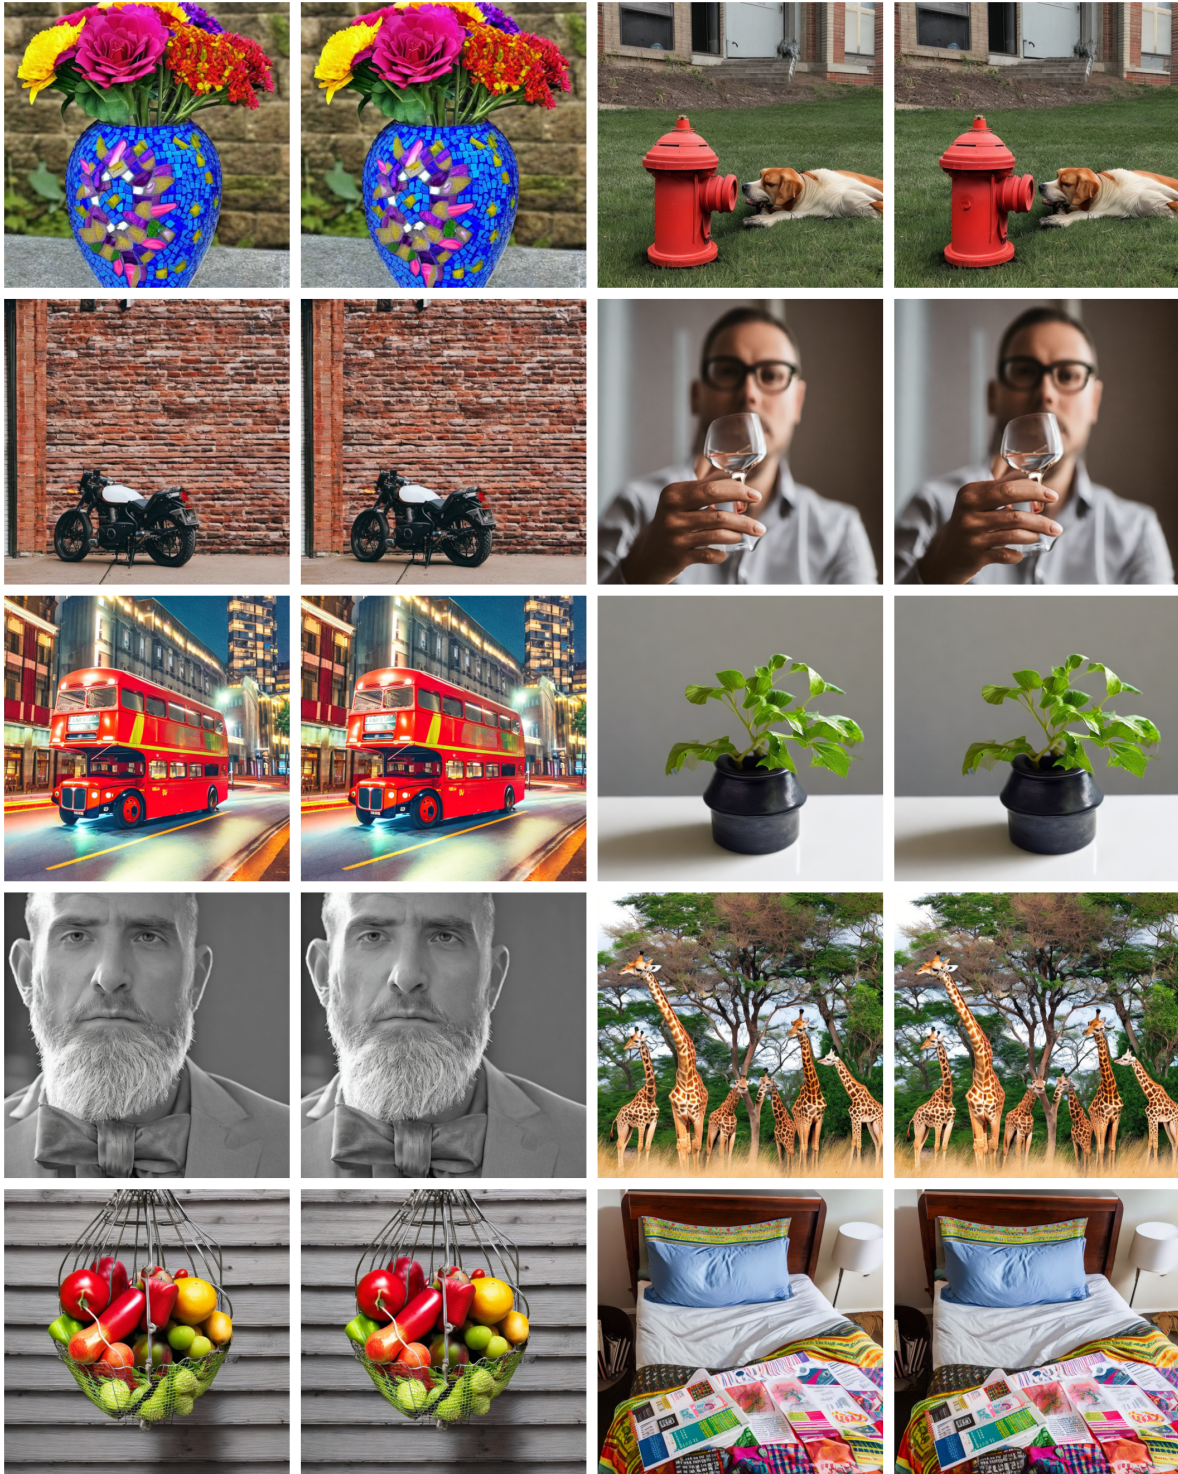

**Figure 8.** Results obtained using DDIM sampling on Stable Diffusion v2 are shown. In each row, the first and third images correspond to the 50-step outputs from the original process, while the remaining two images display the LTC-ACCEL results achieved in just 30 steps.



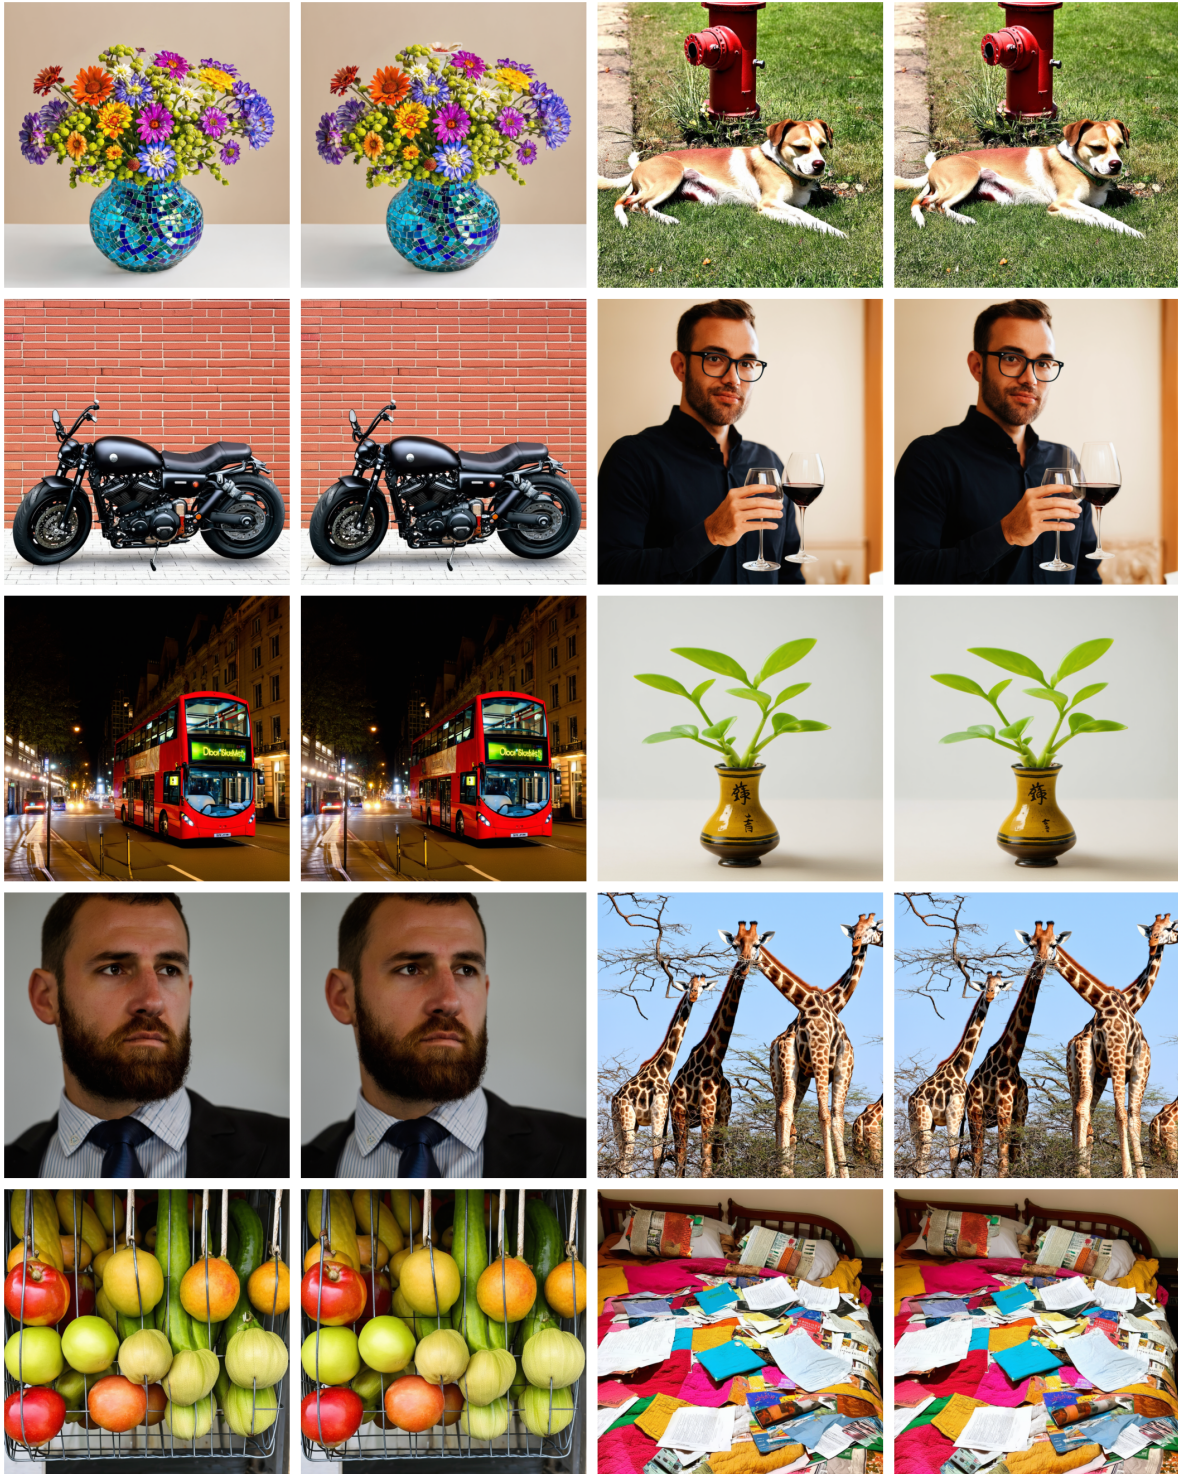

**Figure 9.** Results obtained using EDM sampling on Stable Diffusion v3.5 are shown. In each row, the first and third images correspond to the 60-step outputs from the original process, while the remaining two images display the LTC-ACCEL results achieved in just 39 steps.



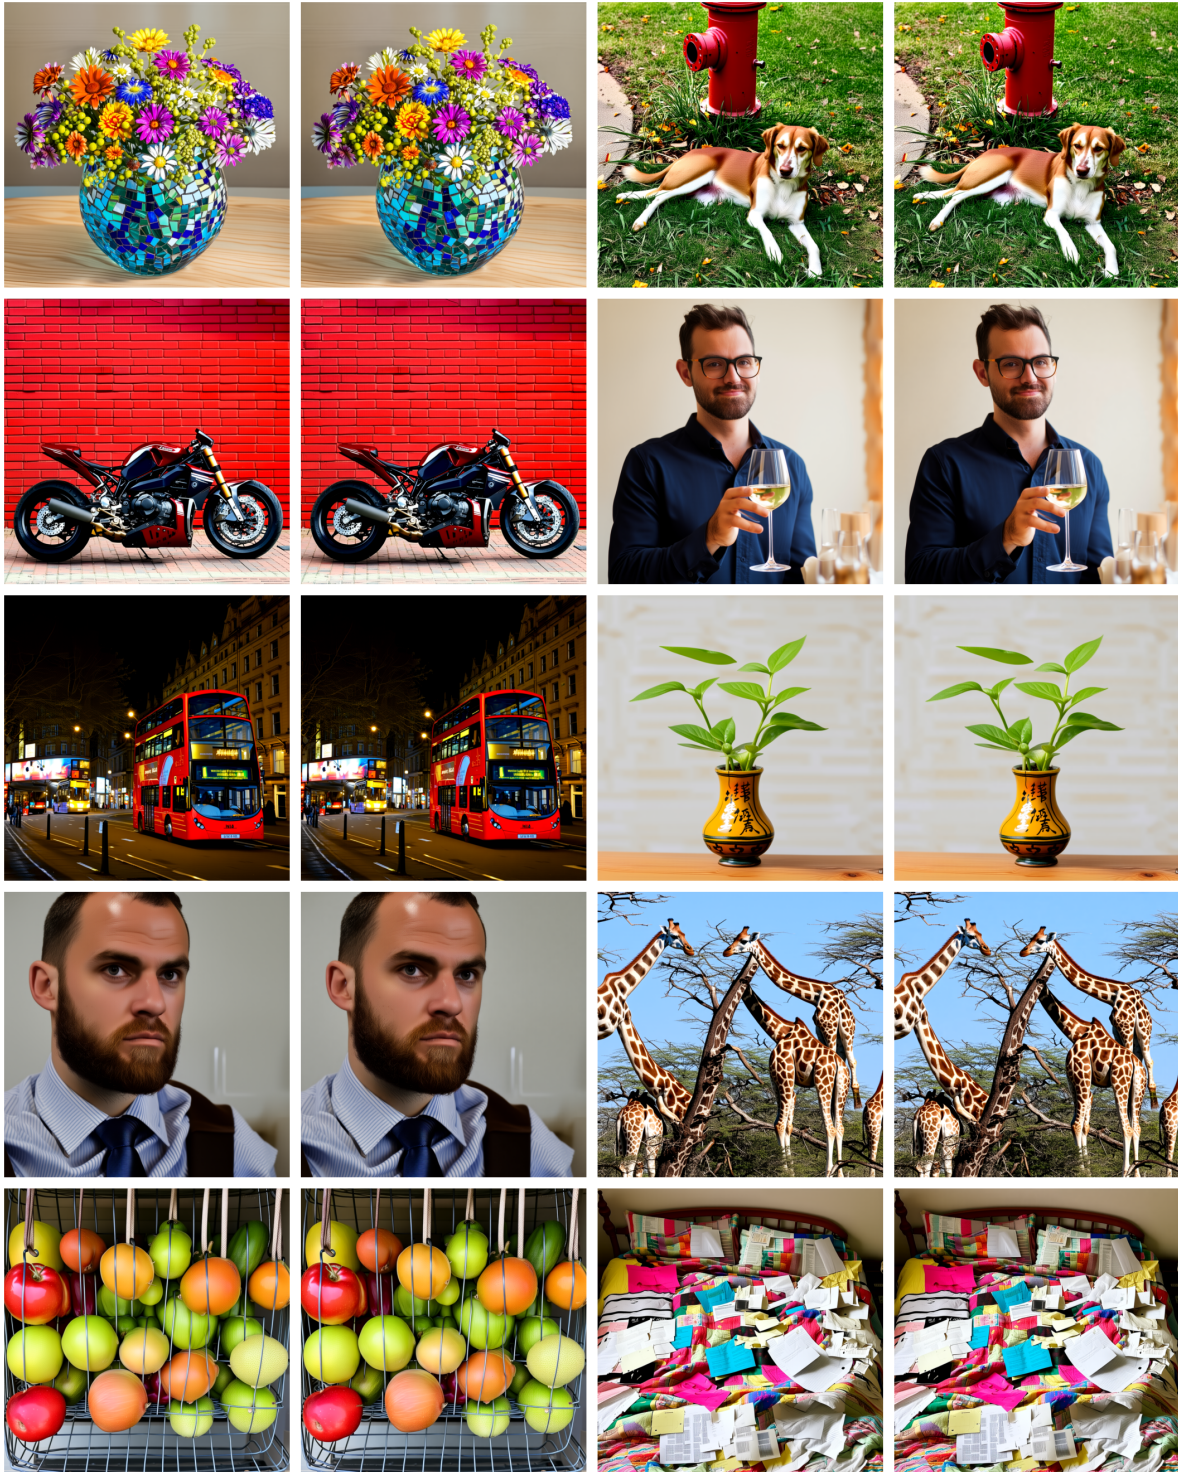

**Figure 10.** Results obtained using DPMSolver++ sampling on Stable Diffusion v3.5 are shown. In each row, the first and third images correspond to the 60-step outputs from the original process, while the remaining two images display the LTC-ACCEL results achieved in 40 steps.



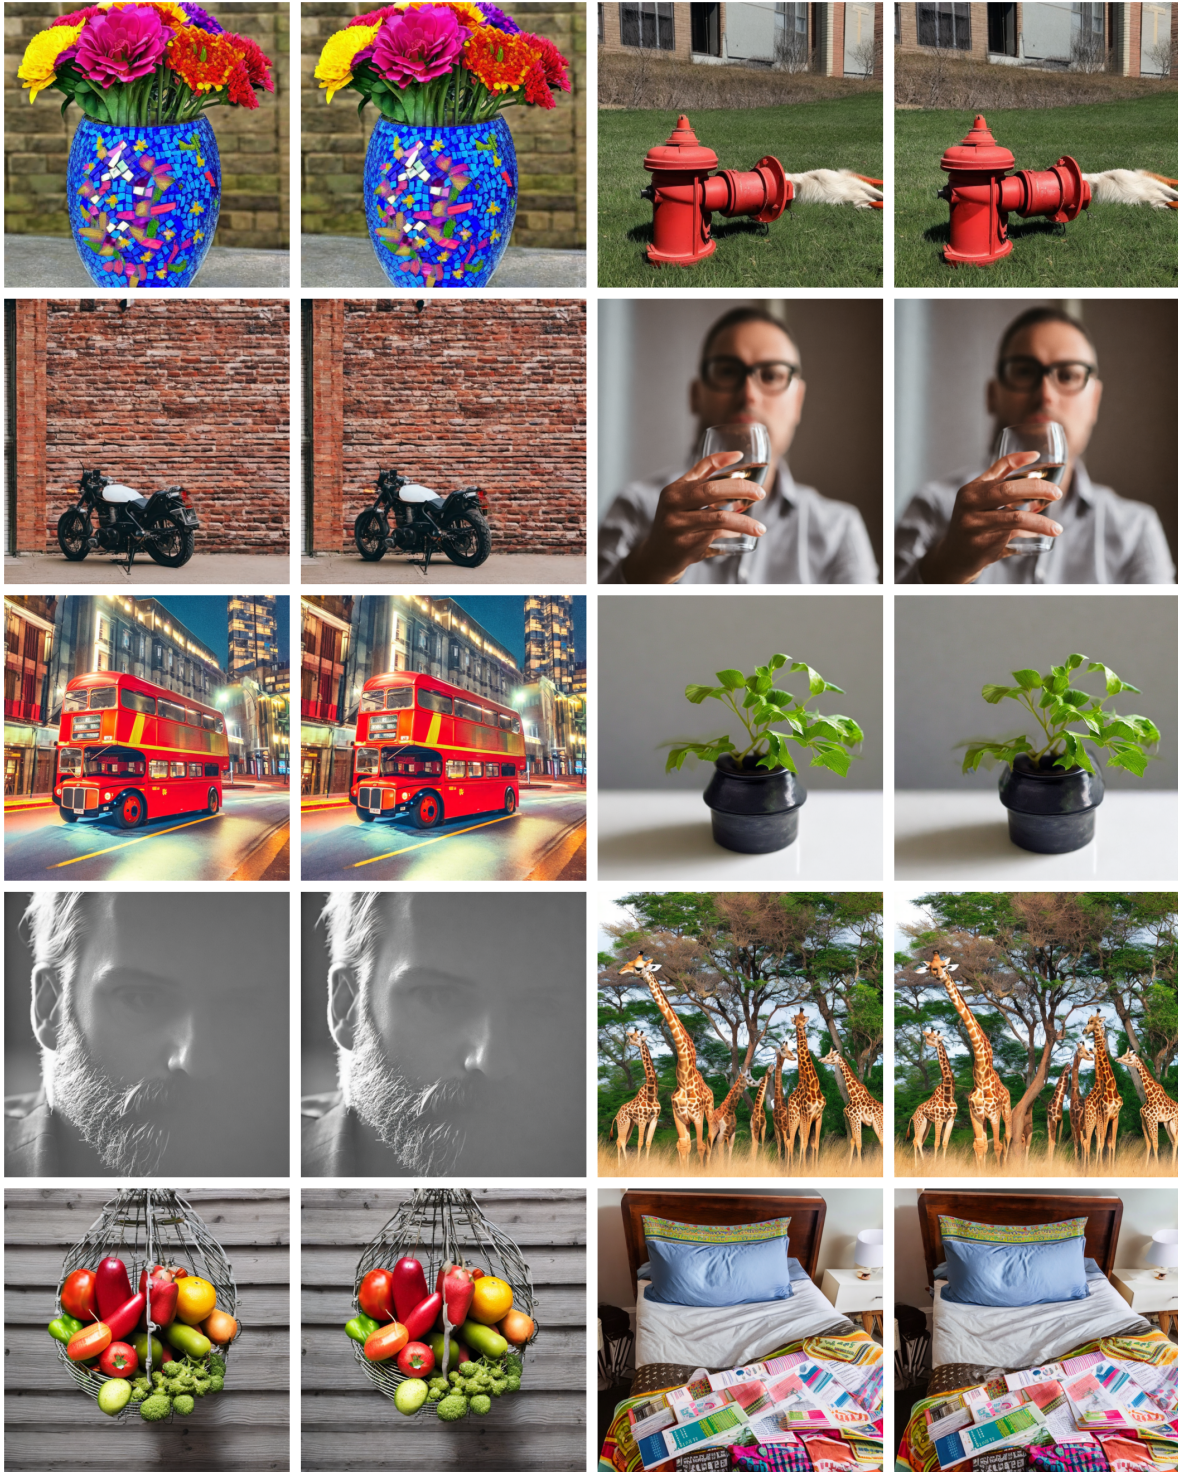

**Figure 11.** Based on the DeepCache model, the results obtained using DDIM sampling on Stable Diffusion v2 are presented. In each row, the first and third images depict the DeepCache results after 50 iterations, while the remaining two images display the outputs from LTC-ACCEL combined with DeepCache after 38 iterations.



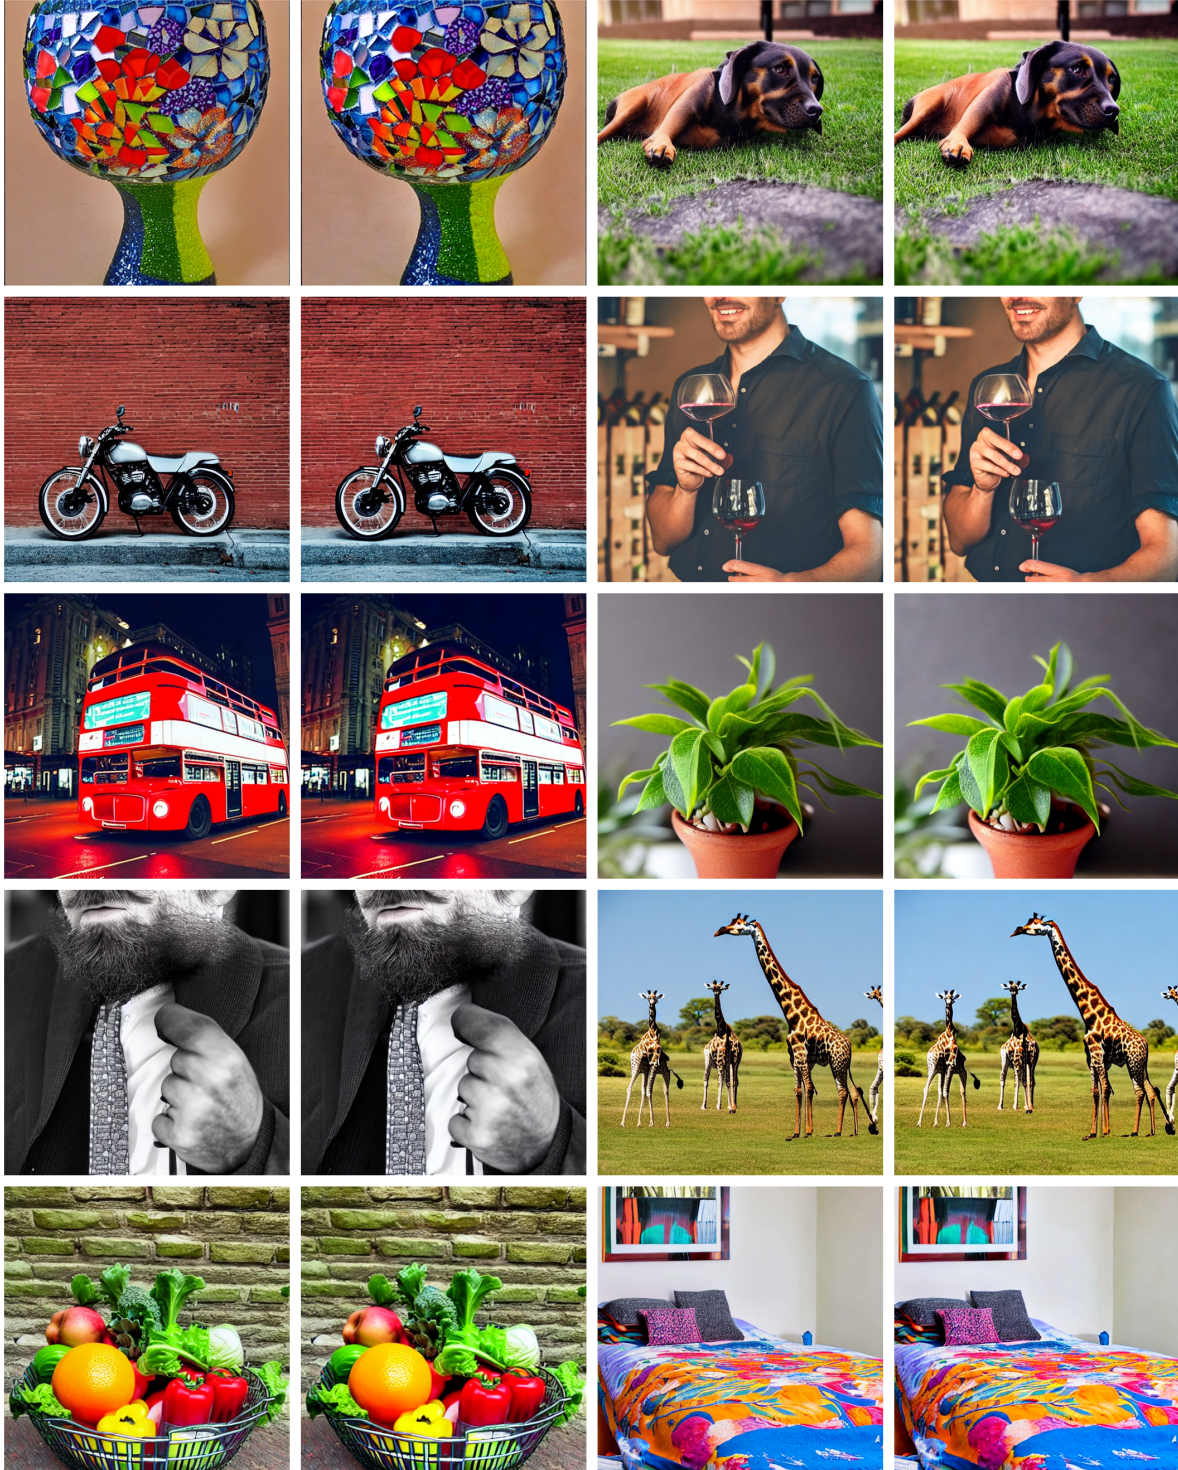

**Figure 12.** Based on the Align Your Steps method, we obtained sampling results using DPM-Solver++ on Stable Diffusion v1.5. In each row, the first and third images represent the outputs after 10 iterations using only the “Align Your Steps” approach, while the second and fourth images show the results achieved by combining LTC-ACCEL with align your step for 8 iterations.



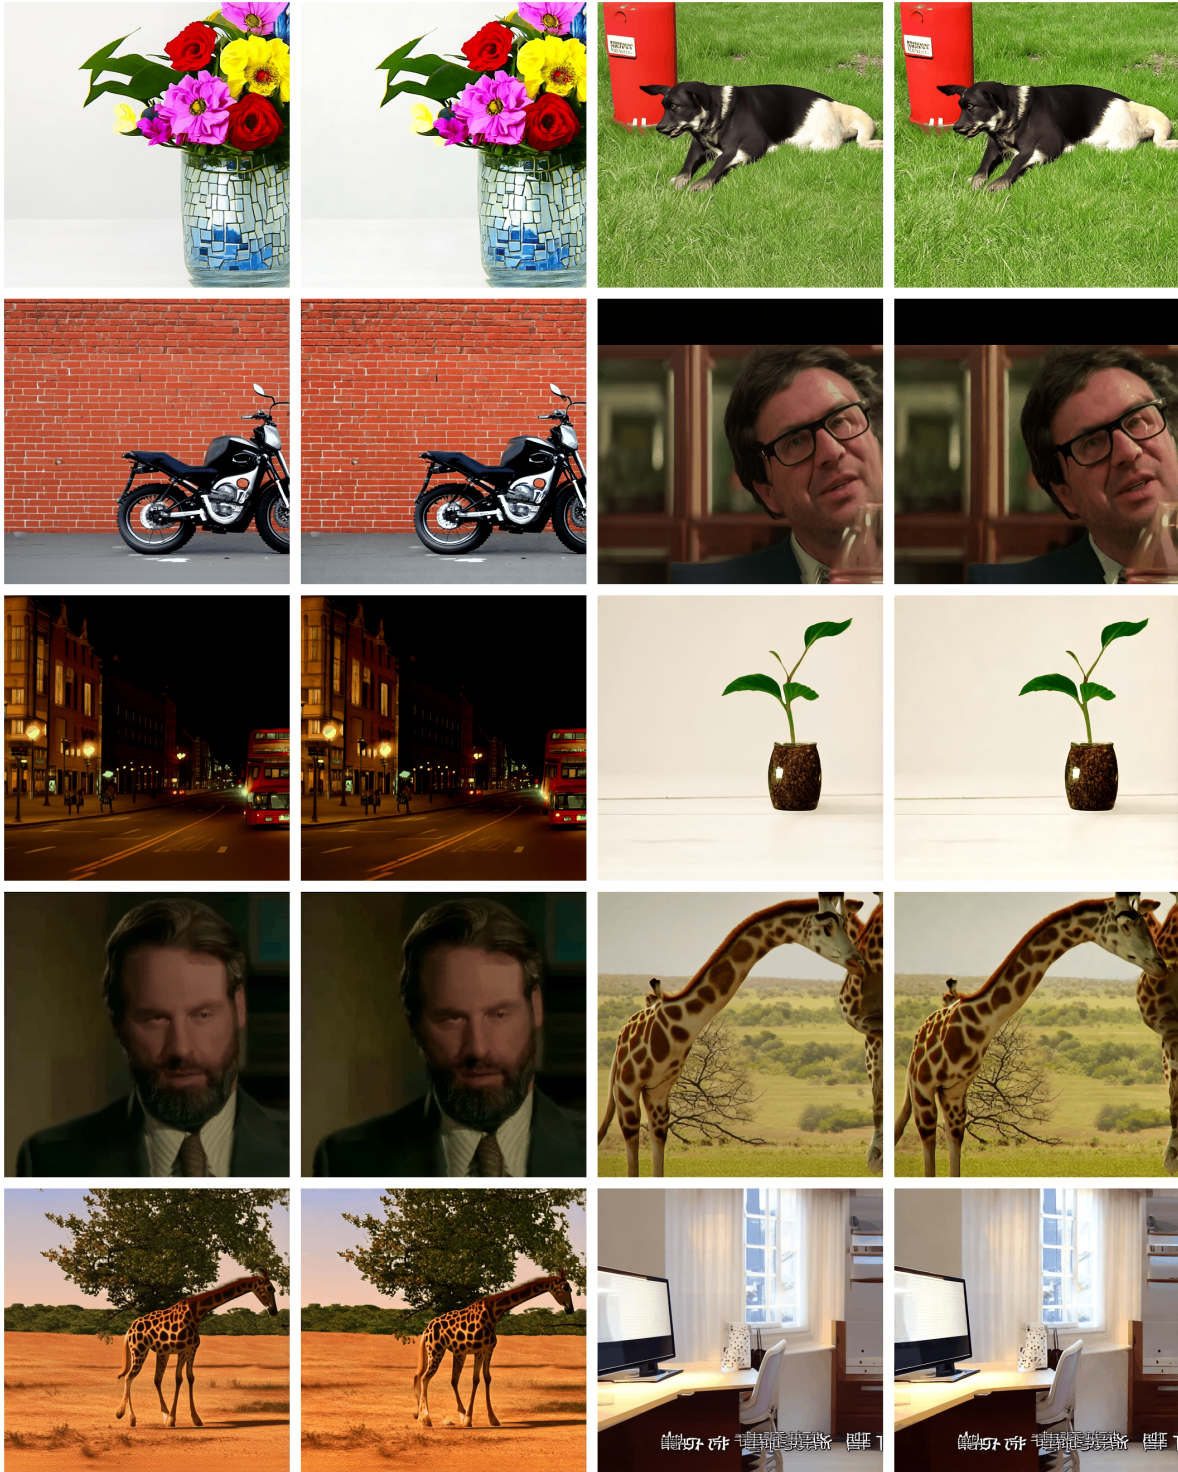

**Figure 13.** Results obtained using DDIM sampling on CogVideoX-2B, with only the first frame of each video selected. In each row, the first and third images represent the outputs after 40 iterations of the original process, while the remaining two images display the LTC-ACCEL results achieved in 26 iterations.

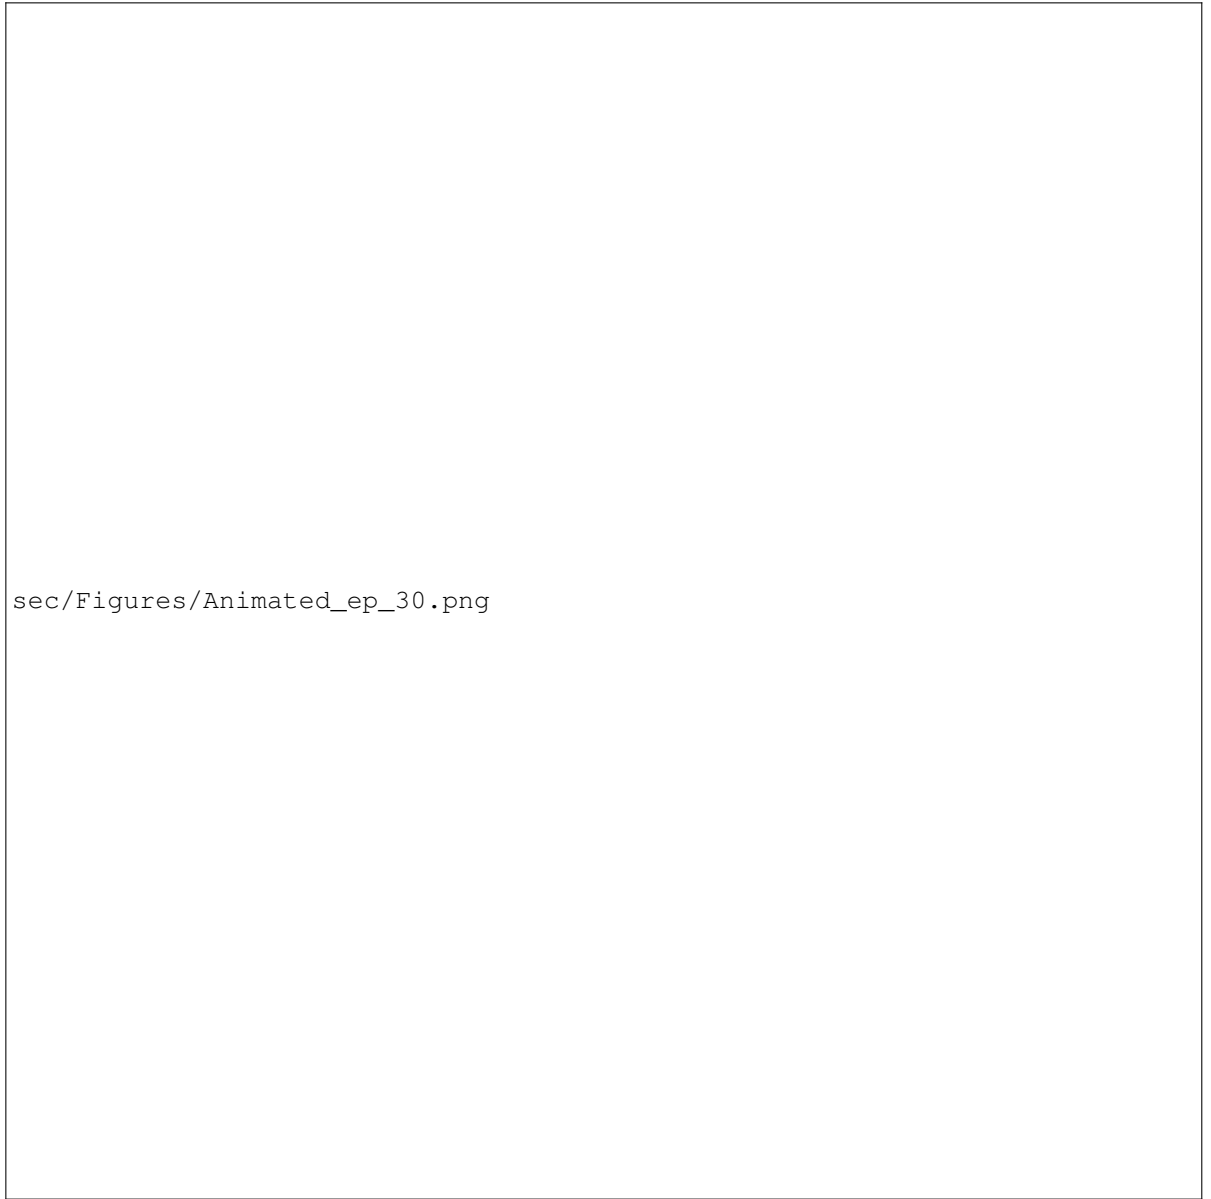

sec/Figures/Animated\_ep\_30.png

**Figure 14.** Using EDM sampling on the Animated-Diff model based on epiCRealism, we obtained results where only the first frame of each video was selected. In each row, the first and third images correspond to the outputs after 30 iterations of the original process, while the remaining two images show the LTC-ACCEL results achieved in 19 iterations.

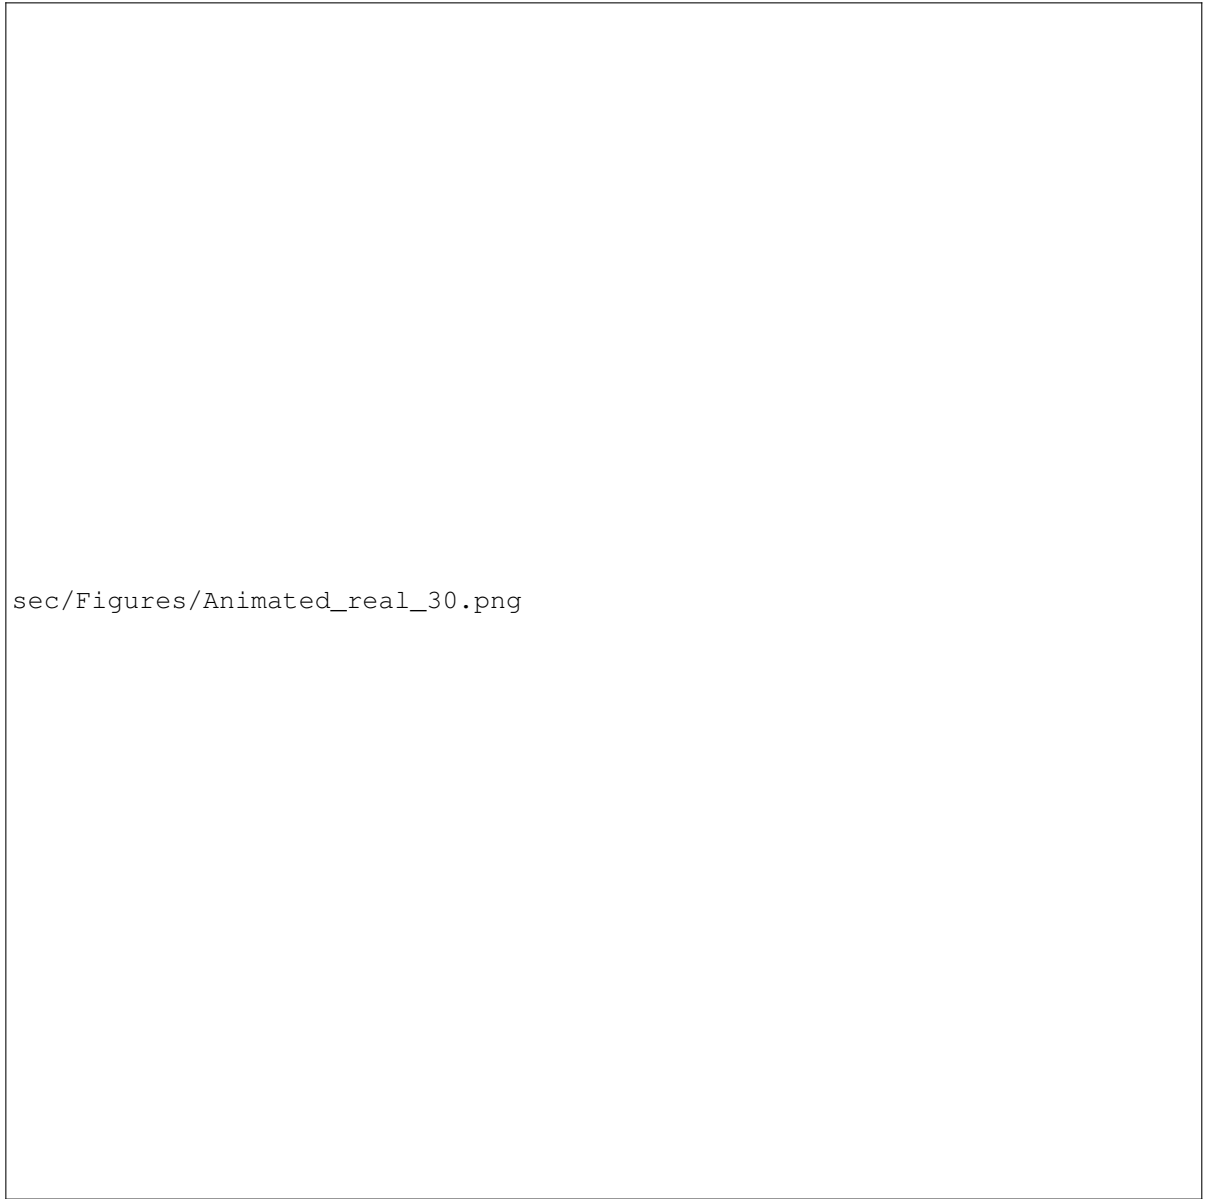

**Figure 15.** Using EDM sampling on the Animated-Diff model based on realistic-vision, we obtained results where only the first frame of each video was selected. In each row, the first and third images correspond to the outputs after 30 iterations of the original process, while the remaining two images show the LTC-ACCEL results achieved in 19 iterations.

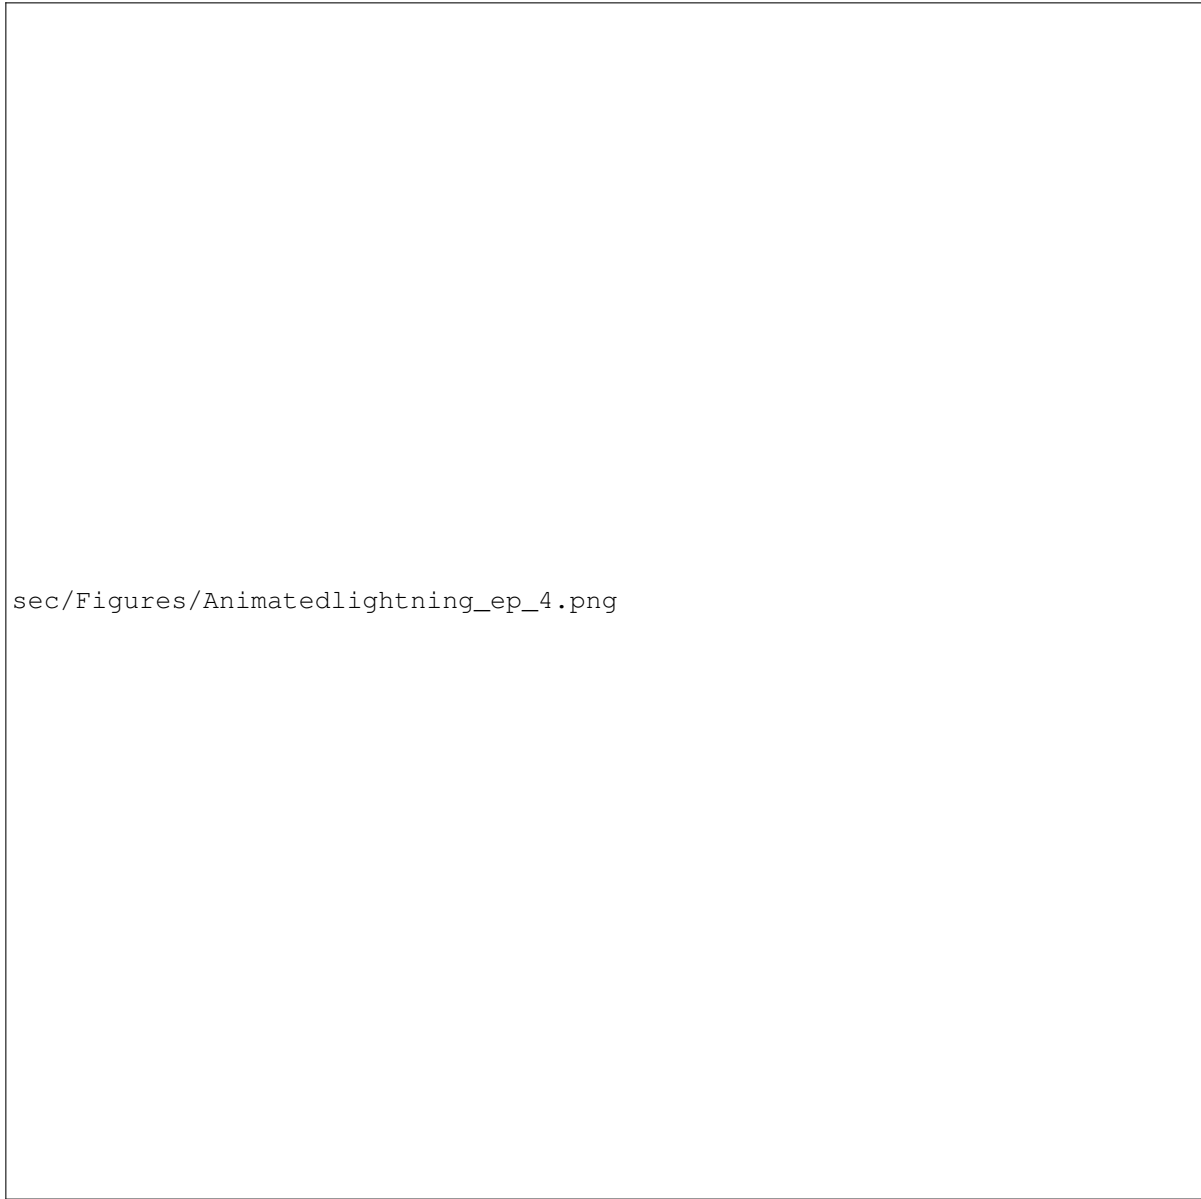

sec/Figures/Animatedlightning\_ep\_4.png

**Figure 16.** Using EDM sampling on the Animated-Diff-Lightning model based on epiCRealism, we obtained results where only the first frame of each video was selected. In each row, the first and third images correspond to the outputs after 4 iterations of the original process, while the remaining two images show the LTC-ACCEL results achieved in 3 iterations.

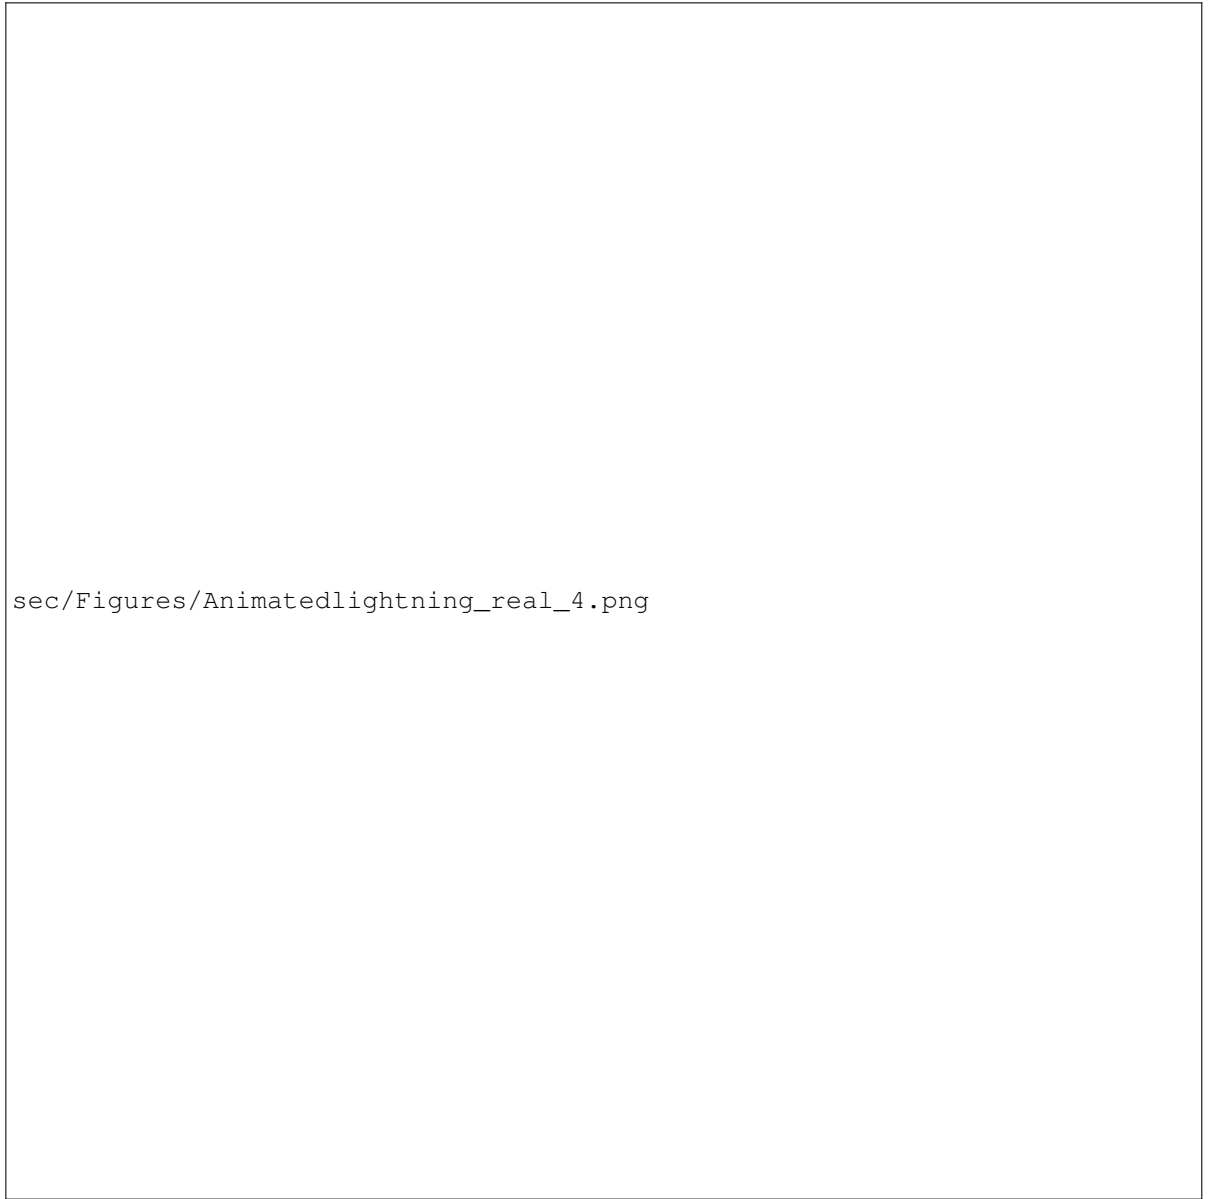

sec/Figures/Animatedlightning\_real\_4.png

**Figure 17.** Using EDM sampling on the Animated-Diff-Lightning model based on realistic-vision, we obtained results where only the first frame of each video was selected. In each row, the first and third images correspond to the outputs after 4 iterations of the original process, while the remaining two images show the LTC-ACCEL results achieved in 3 iterations.
